# Supplementary material for: Enzymology and thermal stability of phytase appA mutants
Source: Royal Society of Chemistry journal article supplement (doi:10.1039/c5ra02199e), 2015-01-01
Supplement: c5ra02199e1.pdf [file c5ra02199e1.pdf]

## Supporting information

Table S1 Oligonucleotide primers used for site-directed mutagenesis of the appAM10

| Names of primers          | The sequences of primers (5'→3')             |
|---------------------------|----------------------------------------------|
| appA(W46E)- Forward       | GCCAGTCAAGCTGGGT <u>GAG</u> TTGACACCTAGAGG   |
| appA (W46E)- Reverse      | CCTCTAGGTGTCAACTC <u>ACCC</u> AGCTTGACTGGC   |
| appA(Q62W)- Forward       | GTCACTACTGGAGACAGCGTCTTGTTGC                 |
| appA(Q62W)- Reverse       | GCAACAAGACGCTGTCT <u>CCAG</u> TAGTGAC        |
| appA(A73P, K75C)- Forward | GGATTGTTG <u>CCCAAGTGT</u> GGTTGTCCACAATC    |
| appA(A73P, K75C)- Reverse | GATTGTGGACAACC <u>ACA</u> CTTGGGCAACAATCC    |
| appA(S146E)- Forward      | GCTATCTTG <u>GAG</u> AGAGCTGGAGGATC          |
| appA(S146E)- Reverse      | GATCCTCCAGCTCT <u>CTC</u> CAAGATAGC          |
| appA(R159Y)- Forward      | GACTTCACCGGTCACT <u>TACC</u> AGACTGCCTTCAGAG |
| appA(R159Y)- Reverse      | CTCTGAAGGCAGTCTGGT <u>AGT</u> GACCGGTGAAGTC  |
| appA(N204C)- Forward      | GAAGGTCTCCGCCGACT <u>TGCG</u> TCTCTTTG       |
| appA (N204C)- Reverse     | CAAAGAGAC <u>GCAG</u> TCGGCGGAGACCTTC        |
| appA(Y255D)- Forward      | CGCTCAATTC <u>GACT</u> TGCTGCAGAGAACTCC      |
| appA(Y255D)- Reverse      | GGAGTTCTCTGCAGCAAGT <u>TCGA</u> ATTGAGCG     |
| appA(Q258N)- Forward      | CGACTTGCTG <u>AAC</u> AGAACTCCAGAGG          |
| appA(Q258N)- Reverse      | CCTCTGGAGTTCTG <u>TTC</u> AGCAAGTCG          |
| appA(Q349N)- Forward      | CTCTCAATGGATT <u>AAC</u> GTTTCGTTGG          |
| appA (Q349N)- Reverse     | CCAACGAAACGTTAATCCATTGAGAG                   |

Underlined primer sequences represent the mutated codon for the target amino acid residue.

Table S2 Protein-engineering examples of *Escherichia coli* phytase appA

| Project goal                                    | Expression system                                               | Experimental strategies                                            | Results                                                                                                                                                                                                                                                                     | Reference |
|-------------------------------------------------|-----------------------------------------------------------------|--------------------------------------------------------------------|-----------------------------------------------------------------------------------------------------------------------------------------------------------------------------------------------------------------------------------------------------------------------------|-----------|
| Improve thermostability and specific activity   | <i>Escherichia coli</i> BL21(DE3)<br><i>Pichia pastoris</i> X33 | Structure-based rational design, site-directed mutagenesis         | V89T, N204A and S206A exhibited increase in catalytic activity. Three glycosylation sites (NQT74-76, NFS171-173, NGT282-284) were found beneficial in promoting thermostability.                                                                                            | [13]      |
| Improve thermostability                         | <i>Escherichia coli</i> Origami(DE3)                            | Error-prone PCR, high-throughput screening                         | After treatment at 85°C for 5 min, the mutant I408L remained 51.3% residual activity and the thermostability of a 23.3% increase compared with wild-type.                                                                                                                   | [27]      |
| Improve thermostability and gastric performance | <i>Escherichia coli</i> K-12                                    | Gene site saturation mutagenesis (GSSM), high-throughput screening | The mutant Phy9X was a highly active phytase with no loss of activity after heating at 62 °C for 1 h and 27% of its initial activity after 10 min at 85 °C and a 3.5-fold enhancement in gastric stability.                                                                 | [14]      |
| Improve thermostability                         | <i>Escherichia coli</i> Origami(DE3)                            | Change salt bridges, site-directed mutagenesis                     | After being heated at 80°C for 10 min, the salt bridge addition mutant Q307D was 40.57% residual activity and showed 9.15% thermostability enhancement than the wild-type.                                                                                                  | [28]      |
| Improve thermostability                         | <i>Escherichia coli</i> Origami(DE3)                            | Multi-factors rational design strategy, site-directed mutagenesis  | Three thermostable mutants (Q206E/I427L Y311K/I427L and Q206E/Y311K/I427L) were obtained. The mutant Y311K/I427L got 61.7 % residual activity after being heated at 80 °C for 10 min and catalytic efficiency (4.46 was compared to 2.37) improved more than the wild-type. | [29]      |

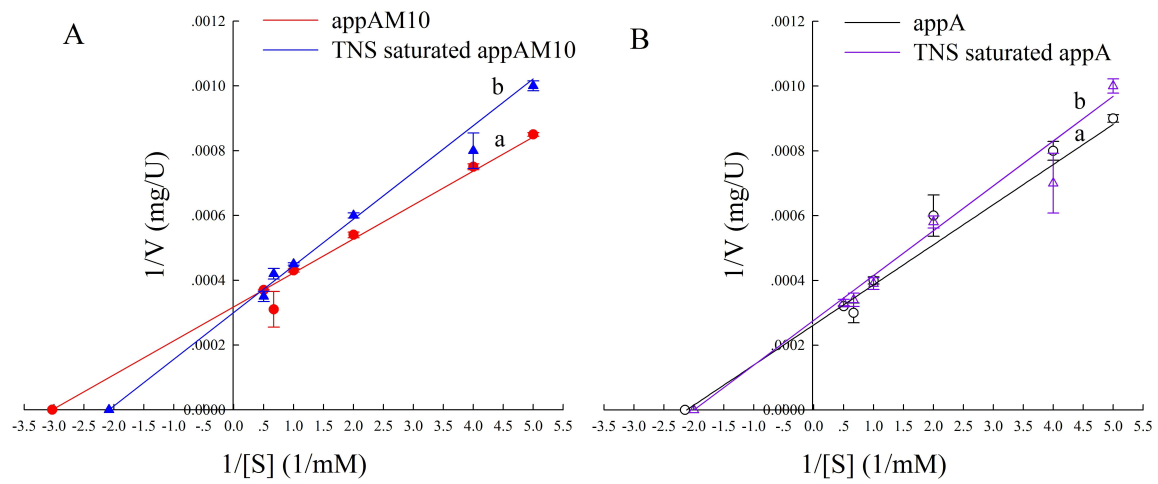

Fig. S1 (A) The plot of  $\frac{1}{V}$  versus  $\frac{1}{[S]}$  of appAM10 (a) and TNS saturated appAM10 (b). (B) The plot of  $\frac{1}{V}$  versus  $\frac{1}{[S]}$  of appA (a) and TNS saturated appA (b).
